# Supplementary material for: Survival in elderly patients with breast cancer with and without autoimmune disease
Source: PubMed Central journal article supplement (PMC10315719; doi:10.1002/cam4.5989), 2023-04-26
Supplement: CAM4-12-13086-s001.pdf [file CAM4-12-13086-s001.pdf]

**Supplement:**

Supplement 1: ICD-9 Diagnosis Codes for Identification of Autoimmune Disease

| <b>Autoimmune Disease</b>    | <b>ICD-9 Diagnosis Code</b>            |
|------------------------------|----------------------------------------|
| Crohn's Disease              | 555, 555.1, 555.2, 555.3, 555.8, 555.9 |
| Dermatomyositis              | 710.3                                  |
| Polymyositis                 | 710.4                                  |
| Psoriasis                    | 696, 696.1, 696.2                      |
| Rheumatoid Arthritis         | 714, 714.1, 714.2                      |
| Sarcoidosis                  | 135                                    |
| Systemic Scleroderma         | 710.1                                  |
| Sjogren's Syndrome           | 710.2                                  |
| Systemic Lupus Erythematosus | 710                                    |
| Ulcerative Colitis           | 556.5, 556.6, 556.8, 556.9             |

Supplement 2: ICD-10 Codes to Identify Patients who died of their Cancer

| <b>ICD-10 Codes</b>                                                                                        |
|------------------------------------------------------------------------------------------------------------|
| General Codes: C798, C80, C97, D489<br>Site Specific Codes: C32-C34, C39, C780, D022, D143, D144, D15, D38 |

Supplement 3: Commonly Used Chemotherapy Agents for the Treatment of Breast Cancer

| <b>Agent</b> | <b>Healthcare Common Procedure Coding System Codes</b> |
|--------------|--------------------------------------------------------|
| Docetaxel    | J9171, J9170                                           |
| Paclitaxel   | C9127, C9431, J9264, J9265, J9267                      |
| Doxorubicin  | J9000, C9415, J9002, Q2048, Q2049, Q2050, J9001        |
| Gemcitabine  | J9201                                                  |

Supplement 4A: Univariate and Multivariable Cox Regression Analysis on OS (Stage I Patients)

| Variables                                       | Univariate analysis |          | Multivariable analysis |          |
|-------------------------------------------------|---------------------|----------|------------------------|----------|
|                                                 | HR (95% CI)         | p-value  | HR (95% CI)            | p-value  |
| Autoimmune disease (No vs. Yes)                 | 0.73 (0.7, 0.77)    | < 0.0001 | 1.05 (1.01, 1.1)       | 0.025    |
| Age (per year increase)                         | 1.12 (1.11, 1.12)   | < 0.0001 | 1.09 (1.09, 1.1)       | < 0.0001 |
| Race                                            |                     |          |                        |          |
| Black vs. White                                 | 1.16 (1.08, 1.25)   | < 0.0001 | 1.33 (1.23, 1.43)      | < 0.0001 |
| Others vs. White                                | 0.47 (0.41, 0.52)   | < 0.0001 | 0.58 (0.51, 0.65)      | < 0.0001 |
| CKD (No vs. Yes)                                | 0.17 (0.16, 0.18)   | < 0.0001 | 0.35 (0.33, 0.36)      | < 0.0001 |
| Charlson comorbidity index (per index increase) | 1.68 (1.67, 1.7)    | < 0.0001 |                        |          |
| NCI comorbidity index (per index increase)      | 1.61 (1.59, 1.62)   | < 0.0001 |                        |          |
| Chemotherapy (No vs. Yes)                       | 0.52 (0.47, 0.56)   | < 0.0001 | 0.49 (0.45, 0.55)      | < 0.0001 |
| Radiation (No vs. Yes)                          | 2.26 (2.16, 2.36)   | < 0.0001 | 1.66 (1.58, 1.73)      | < 0.0001 |

CI, confidence interval; HR, hazard ratio; OS, overall survival.

Supplement 4B: Proportional Hazards Regression with Death as the Competing Risk on CSM (Stage I Patients)

| Variables                                       | Univariate analysis |          | Multivariable analysis |          |
|-------------------------------------------------|---------------------|----------|------------------------|----------|
|                                                 | HR (95% CI)         | p-value  | HR (95% CI)            | p-value  |
| Autoimmune disease (No vs. Yes)                 | 0.97 (0.86, 1.08)   | 0.541    | 1.35 (1.2, 1.51)       | < 0.0001 |
| Age (per year increase)                         | 1.04 (1.04, 1.05)   | < 0.0001 | 1.04 (1.03, 1.05)      | < 0.0001 |
| Race                                            |                     |          |                        |          |
| Black vs. White                                 | 1.78 (1.53, 2.06)   | < 0.0001 | 1.73 (1.49, 2.01)      | < 0.0001 |
| Others vs. White                                | 0.68 (0.53, 0.88)   | 0.003    | 0.79 (0.61, 1.01)      | 0.059    |
| CKD (No vs. Yes)                                | 0.39 (0.35, 0.44)   | < 0.0001 | 0.58 (0.51, 0.66)      | < 0.0001 |
| Charlson comorbidity index (per index increase) | 1.31 (1.26, 1.35)   | < 0.0001 |                        |          |
| NCI comorbidity index (per index increase)      | 1.26 (1.22, 1.3)    | < 0.0001 |                        |          |
| Chemotherapy (No vs. Yes)                       | 0.11 (0.09, 0.12)   | < 0.0001 | 0.11 (0.09, 0.12)      | < 0.0001 |
| Radiation (No vs. Yes)                          | 1.74 (1.56, 1.93)   | < 0.0001 | 1.53 (1.37, 1.71)      | < 0.0001 |

CI, confidence interval; CSM, cancer specific mortality; HR, hazard ratio.

Supplement 5A: Univariate and Multivariable Cox Regression Analysis on OS (Stage II Patients)

| Variables                                       | Univariate analysis |          | Multivariable analysis |          |
|-------------------------------------------------|---------------------|----------|------------------------|----------|
|                                                 | HR (95% CI)         | p-value  | HR (95% CI)            | p-value  |
| Autoimmune disease (No vs. Yes)                 | 0.85 (0.81, 0.9)    | < 0.0001 | 1.24 (1.18, 1.31)      | < 0.0001 |
| Age (per year increase)                         | 1.08 (1.07, 1.08)   | < 0.0001 | 1.06 (1.06, 1.06)      | < 0.0001 |
| Race                                            |                     |          |                        |          |
| Black vs. White                                 | 1.14 (1.1, 1.22)    | 0.0001   | 1.34 (1.25, 1.43)      | < 0.0001 |
| Others vs. White                                | 0.62 (0.55, 0.69)   | < 0.0001 | 0.73 (0.66, 0.82)      | < 0.0001 |
| CKD (No vs. Yes)                                | 0.24 (0.23, 0.25)   | < 0.0001 | 0.39 (0.38, 0.4)       | < 0.0001 |
| Charlson comorbidity index (per index increase) | 1.57 (1.56, 1.59)   | < 0.0001 |                        |          |
| NCI comorbidity index (per index increase)      | 1.49 (1.48, 1.51)   | < 0.0001 |                        |          |
| Chemotherapy (No vs. Yes)                       | 0.7 (0.66, 0.74)    | < 0.0001 | 0.77 (0.73, 0.82)      | < 0.0001 |
| Radiation (No vs. Yes)                          | 1.99 (1.9, 2.09)    | < 0.0001 | 1.68 (1.6, 1.77)       | < 0.0001 |

CI, confidence interval; HR, hazard ratio; OS, overall survival.

Supplement 5B: Proportional Hazards Regression with Death as the Competing Risk on CSM (Stage II Patients)

| Variables                                       | Univariate analysis |          | Multivariable analysis |          |
|-------------------------------------------------|---------------------|----------|------------------------|----------|
|                                                 | HR (95% CI)         | p-value  | HR (95% CI)            | p-value  |
| Autoimmune disease (No vs. Yes)                 | 1.01 (0.94, 1.09)   | 0.765    | 1.36 (1.26, 1.47)      | < 0.0001 |
| Age (per year increase)                         | 1.02 (1.02, 1.02)   | < 0.0001 | 1.01 (1.01, 1.02)      | < 0.0001 |
| Race                                            |                     |          |                        |          |
| Black vs. White                                 | 1.46 (1.33, 1.6)    | < 0.0001 | 1.43 (1.3, 1.58)       | < 0.0001 |
| Others vs. White                                | 0.71 (0.6, 0.83)    | < 0.0001 | 0.75 (0.64, 0.88)      | 0.0003   |
| CKD (No vs. Yes)                                | 0.51 (0.48, 0.55)   | < 0.0001 | 0.64 (0.59, 0.7)       | < 0.0001 |
| Charlson comorbidity index (per index increase) | 1.21 (1.18, 1.24)   | < 0.0001 |                        |          |
| NCI comorbidity index (per index increase)      | 1.18 (1.16, 1.2)    | < 0.0001 |                        |          |
| Chemotherapy (No vs. Yes)                       | 0.39 (0.36, 0.41)   | < 0.0001 | 0.39 (0.36, 0.42)      | < 0.0001 |
| Radiation (No vs. Yes)                          | 1.52 (1.41, 1.63)   | < 0.0001 | 1.45 (1.35, 1.55)      | < 0.0001 |

CI, confidence interval; CSM, cancer specific mortality; HR, hazard ratio.

Supplement 6A: Univariate and Multivariable Cox Regression Analysis on OS (Stage III Patients)

| Variables                                       | Univariate analysis |          | Multivariable analysis |          |
|-------------------------------------------------|---------------------|----------|------------------------|----------|
|                                                 | HR (95% CI)         | p-value  | HR (95% CI)            | p-value  |
| Autoimmune disease (No vs. Yes)                 | 0.93 (0.87, 0.99)   | 0.027    | 1.34 (1.25, 1.43)      | < 0.0001 |
| Age (per year increase)                         | 1.05 (1.04, 1.05)   | < 0.0001 | 1.03 (1.03, 1.04)      | < 0.0001 |
| Race                                            |                     |          |                        |          |
| Black vs. White                                 | 1.28 (1.18, 1.37)   | < 0.0001 | 1.42 (1.32, 1.54)      | < 0.0001 |
| Others vs. White                                | 0.78 (0.68, 0.88)   | 0.0001   | 0.86 (0.75, 0.97)      | 0.018    |
| CKD (No vs. Yes)                                | 0.33 (0.31, 0.35)   | < 0.0001 | 0.47 (0.44, 0.5)       | < 0.0001 |
| Charlson comorbidity index (per index increase) | 1.44 (1.42, 1.47)   | < 0.0001 |                        |          |
| NCI comorbidity index (per index increase)      | 1.4 (1.38, 1.42)    | < 0.0001 |                        |          |
| Chemotherapy (No vs. Yes)                       | 0.61 (0.58, 0.65)   | < 0.0001 | 0.79 (0.74, 0.84)      | < 0.0001 |
| Radiation (No vs. Yes)                          | 1.86 (1.76, 1.97)   | < 0.0001 | 1.6 (1.51, 1.69)       | < 0.0001 |

CI, confidence interval; HR, hazard ratio; OS, overall survival.

Supplement 6B: Proportional Hazards Regression with Death as the Competing Risk on CSM (Stage III Patients)

| Variables                                       | Univariate analysis |          | Multivariable analysis |          |
|-------------------------------------------------|---------------------|----------|------------------------|----------|
|                                                 | HR (95% CI)         | p-value  | HR (95% CI)            | p-value  |
| Autoimmune disease (No vs. Yes)                 | 1.07 (0.99, 1.15)   | 0.107    | 1.41 (1.29, 1.53)      | < 0.0001 |
| Age (per year increase)                         | 1.02 (1.02, 1.02)   | < 0.0001 | 1.01 (1.01, 1.01)      | < 0.0001 |
| Race                                            |                     |          |                        |          |
| Black vs. White                                 | 1.34 (1.23, 1.46)   | < 0.0001 | 1.37 (1.25, 1.49)      | < 0.0001 |
| Others vs. White                                | 0.87 (0.75, 1.01)   | 0.058    | 0.94 (0.81, 1.09)      | 0.423    |
| CKD (No vs. Yes)                                | 0.55 (0.51, 0.59)   | < 0.0001 | 0.69 (0.63, 0.75)      | < 0.0001 |
| Charlson comorbidity index (per index increase) | 1.18 (1.15, 1.21)   | < 0.0001 |                        |          |
| NCI comorbidity index (per index increase)      | 1.16 (1.13, 1.19)   | < 0.0001 |                        |          |
| Chemotherapy (No vs. Yes)                       | 0.53 (0.49, 0.56)   | < 0.0001 | 0.55 (0.51, 0.59)      | < 0.0001 |
| Radiation (No vs. Yes)                          | 1.53 (1.43, 1.64)   | < 0.0001 | 1.44 (1.35, 1.54)      | < 0.0001 |

CI, confidence interval; CSM, cancer specific mortality; HR, hazard ratio.

Supplement 7A: Univariate and Multivariable Cox Regression Analysis on OS (Stage IV Patients)

| Variables                                       | Univariate analysis |          | Multivariable analysis |          |
|-------------------------------------------------|---------------------|----------|------------------------|----------|
|                                                 | HR (95% CI)         | p-value  | HR (95% CI)            | p-value  |
| Autoimmune disease (No vs. Yes)                 | 1.14 (1.07, 1.22)   | 0.0001   | 1.45 (1.35, 1.55)      | < 0.0001 |
| Age (per year increase)                         | 1.04 (1.035, 1.04)  | < 0.0001 | 1.036 (1.03, 1.04)     | < 0.0001 |
| Race                                            |                     |          |                        |          |
| Black vs. White                                 | 1.13 (1.05, 1.22)   | 0.001    | 1.32 (1.23, 1.43)      | < 0.0001 |
| Others vs. White                                | 0.64 (0.56, 0.73)   | < 0.0001 | 0.72 (0.63, 0.82)      | < 0.0001 |
| CKD (No vs. Yes)                                | 0.6 (0.57, 0.64)    | < 0.0001 | 0.76 (0.71, 0.8)       | < 0.0001 |
| Charlson comorbidity index (per index increase) | 1.31 (1.28, 1.33)   | < 0.0001 |                        |          |
| NCI comorbidity index (per index increase)      | 1.25 (1.23, 1.27)   | < 0.0001 |                        |          |
| Chemotherapy (No vs. Yes)                       | 1.01 (0.95, 1.07)   | 0.723    | 1.06 (1, 1.12)         | 0.063    |
| Radiation (No vs. Yes)                          | 1.43 (1.35, 1.52)   | < 0.0001 | 1.26 (1.19, 1.34)      | < 0.0001 |

CI, confidence interval; HR, hazard ratio; OS, overall survival.

Supplement 7B: Proportional Hazards Regression with Death as the Competing Risk on CSM (Stage IV Patients)

| Variables                                       | Univariate analysis |          | Multivariable analysis |          |
|-------------------------------------------------|---------------------|----------|------------------------|----------|
|                                                 | HR (95% CI)         | p-value  | HR (95% CI)            | p-value  |
| Autoimmune disease (No vs. Yes)                 | 1.2 (1.11, 1.28)    | < 0.0001 | 1.4 (1.29, 1.5)        | < 0.0001 |
| Age (per year increase)                         | 1.02 (1.022, 1.03)  | < 0.0001 | 1.02 (1, 1.03)         | < 0.0001 |
| Race                                            |                     |          |                        |          |
| Black vs. White                                 | 1.09 (1.01, 1.18)   | 0.031    | 1.2 (1.11, 1.31)       | < 0.0001 |
| Others vs. White                                | 0.65 (0.56, 0.74)   | < 0.0001 | 0.91 (0.62, 0.81)      | < 0.0001 |
| CKD (No vs. Yes)                                | 0.74 (0.69, 0.79)   | < 0.0001 | 0.88 (0.82, 0.94)      | 0.0002   |
| Charlson comorbidity index (per index increase) | 1.11 (1.07, 1.14)   | < 0.0001 |                        |          |
| NCI comorbidity index (per index increase)      | 1.09 (1.06, 1.12)   | < 0.0001 |                        |          |
| Chemotherapy (No vs. Yes)                       | 0.95 (0.9, 1)       | 0.058    | 0.94 (0.89, 1)         | 0.048    |
| Radiation (No vs. Yes)                          | 1.26 (1.19, 1.34)   | < 0.0001 | 1.13 (1.1, 1.21)       | < 0.0001 |

CI, confidence interval; CSM, cancer specific mortality; HR, hazard ratio.
